# Supplementary material for: Near-infrared light triggered superior photocatalytic activity from MoS2–NaYF4:Yb3+/Er3+ nanocomposites
Source: Royal Society of Chemistry journal article supplement (doi:10.1039/c6dt02548j), 2016-01-01
Supplement: c6dt02548j1.pdf [file c6dt02548j1.pdf]

## Supporting Information

# Near-infrared light triggered superior photocatalytic activity from $\text{MoS}_2\text{-NaYF}_4\text{:Yb}^{3+}/\text{Er}^{3+}$ nanocomposites

Manjunath Chatti<sup>a</sup>, Venkata N. K. B. Adusumalli<sup>a</sup>, Sagar Ganguli<sup>a</sup> and Venkataramanan Mahalingam,<sup>\*a</sup>

<sup>a</sup> Department of Chemical Sciences, Indian Institute of Science Education and Research (IISER), Kolkata, Mohanpur, West Bengal 741246, India.

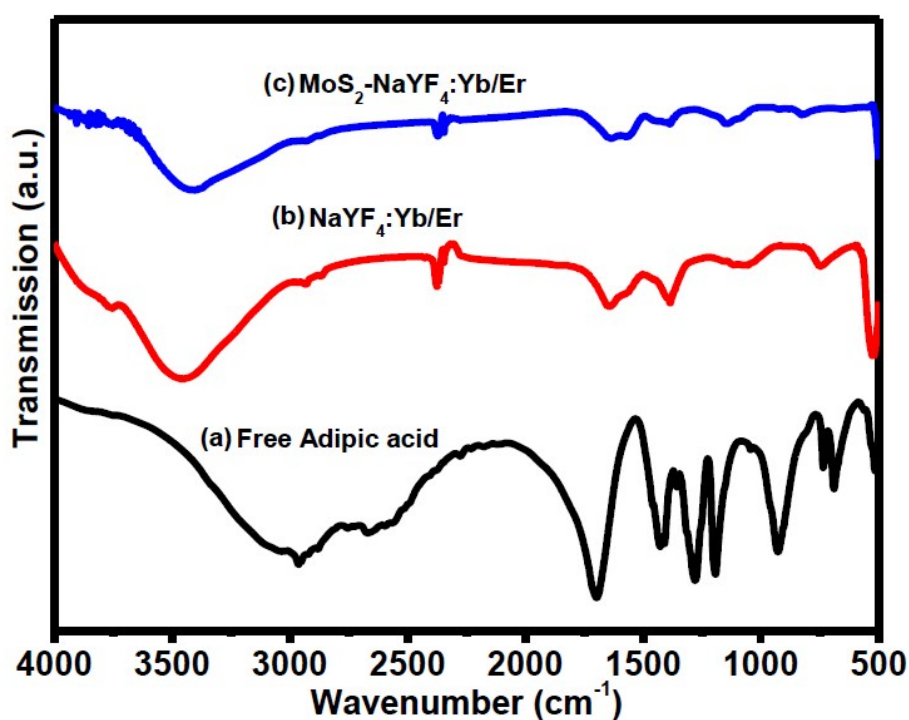

**Figure S1** FTIR spectra of (a) free adipic acid (AA) molecules, AA tailored (b)  $\text{NaYF}_4\text{:Yb}^{3+}/\text{Er}^{3+}$  nanocrystals and (c)  $\text{MoS}_2\text{-NaYF}_4\text{:Yb}^{3+}/\text{Er}^{3+}$  composites.

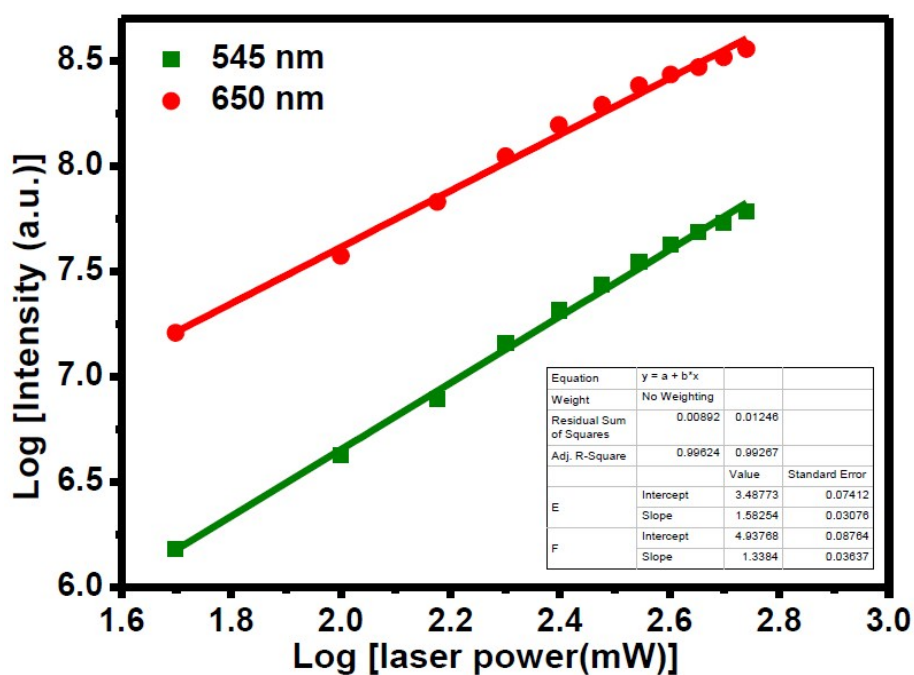

**Figure S2** The logarithmic plots of upconversion emission intensity versus the laser power of  $\text{Yb}^{3+}(20\%)/\text{Er}^{3+}(2\%)$ -doped  $\text{NaYF}_4$  nanocrystals under 980 nm excitation.

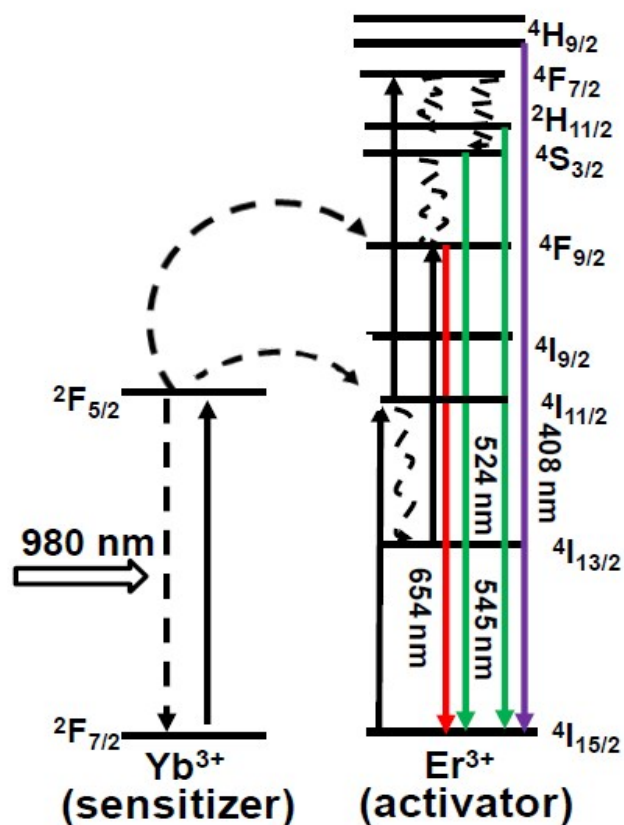

**Figure S3** Energy transfer mechanism between  $\text{Yb}^{3+}$  and  $\text{Er}^{3+}$  via the upconversion processes.

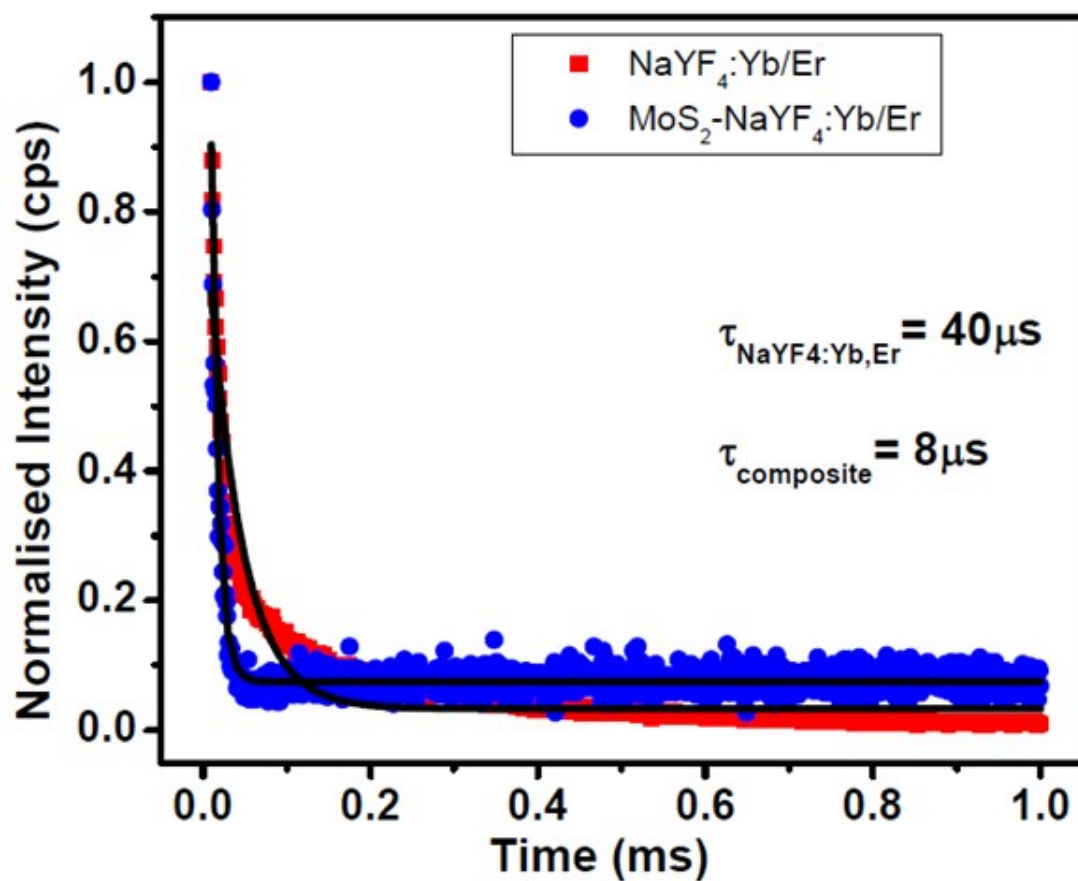

**Figure S4** Lifetime decay curves of Yb<sup>3+</sup>(20%)/Er<sup>3+</sup>(2%)-doped NaYF<sub>4</sub> nanocrystals (red) and MoS<sub>2</sub>-NaYF<sub>4</sub>:Yb<sup>3+</sup>/Er<sup>3+</sup> composites (blue).

**Table 1. Comparison of photocatalytic performance of various upconversion photocatalysts**

| <b>Composite</b>                                                                       | <b>Synthesis Method</b>                            | <b>Dye (Concentration) and % of degradation</b> | <b>Time taken in hours</b> | <b>Reference</b>                              |
|----------------------------------------------------------------------------------------|----------------------------------------------------|-------------------------------------------------|----------------------------|-----------------------------------------------|
| YF <sub>3</sub> :Yb/Tm/TiO <sub>2</sub> core/shell nanoparticles                       | Hydrothermal followed by hydrolysis                | Methylene Blue (15 mg/L), 61 %                  | 30                         | Chem. comm., 2010, 46, 2304-2306              |
| NaYF <sub>4</sub> :Yb/Tm@TiO <sub>2</sub> core-shell nanoparticles                     | Hydrothermal followed by hydrolysis                | Methylene Blue (15 mg/L), 65 %                  | 14                         | ACS Catalysis, 2013, 3, 405-412               |
| NaYF <sub>4</sub> :Yb/Tm@ZnO composite                                                 | Two step-high temperature thermolysis              | Rhodamine B (20 mg/L) 65 %                      | 30                         | PCCP, 15, 2014, 14681-14688                   |
| BiVO <sub>4</sub> /CaF <sub>2</sub> :Er/Tm/Yb                                          | Hydrothermal followed by room temperature stirring | Methyl Orange (10 mg/L), 10 %                   | 6                          | Nanoscale, 2014, 6, 1362-1368                 |
| NaYF <sub>4</sub> :Yb,Tm/CdS/TiO <sub>2</sub>                                          | Stirring followed by heating at 160°C for 3 hours  | Methylene Blue (15 mg/L), ~95 %                 | 50                         | Dalton Trans. 2014, 43, 1048-1054             |
| NaYF <sub>4</sub> :Yb <sup>3+</sup> ,Tm <sup>3+</sup> /g-C <sub>3</sub> N <sub>4</sub> | Calcination at 250°C                               | Methylene Blue (15 mg/L), 83 %                  | 6                          | J. Colloid Interface Sci., 2015, 460, 264-272 |
| <b>MoS<sub>2</sub>-NaYF<sub>4</sub>:Yb/Er</b>                                          | <b>Hydrothermal</b>                                | <b>Rhodamine B (25 mg/L), 61 %</b>              | <b>12</b>                  | <b>Present work</b>                           |
